# Supplementary material
Source: MDPI journal article supplement (https://www.mdpi.com/1424-8247/15/9/1109)
Supplement: s1 [file s1]

## Supporting Information

### A High-Affinity $^{64}\text{Cu}$ -Labeled Ligand for PET Imaging of Hepsin: Design, Synthesis, and Characterization

Ji-Hun Park,<sup>1</sup> Xuran Zhang,<sup>1</sup> Hyunsoo Ha,<sup>2</sup> Jung Young Kim,<sup>3</sup> Joon Young Choi,<sup>1</sup> Kyung-Han Lee,<sup>1,4</sup> Youngjoo Byun,<sup>2</sup> and Yearn Seong Choe<sup>1,4,\*</sup>

1 Department of Nuclear Medicine, Samsung Medical Center, Sungkyunkwan University School of Medicine, Seoul 06351, Korea

2 College of Pharmacy, Korea University, Sejong 30019, Korea

3 Division of Applied RI, Korea Institute of Radiological and Medical Sciences, Seoul 01812, Korea

4 Department of Health Sciences and Technology, SAIHST, Sungkyunkwan University, Seoul 06355, Korea

#### Contents:

|                                                                               |   |
|-------------------------------------------------------------------------------|---|
| $^1\text{H}$ and $^{19}\text{F}$ NMR spectra of <b>1A</b> and <b>1B</b> ..... | 2 |
| $^1\text{H}$ NMR spectra of <b>11A</b> and <b>11B</b> .....                   | 4 |
| HPLC chromatograms of [ $^{64}\text{Cu}$ ] <b>3B</b> .....                    | 5 |
| Figure S1. IC <sub>50</sub> curves .....                                      | 6 |
| Figure S2. In vitro serum stability of [ $^{64}\text{Cu}$ ] <b>3B</b> .....   | 7 |

## $^1\text{H}$ and $^{19}\text{F}$ NMR spectra of 1A and 1B

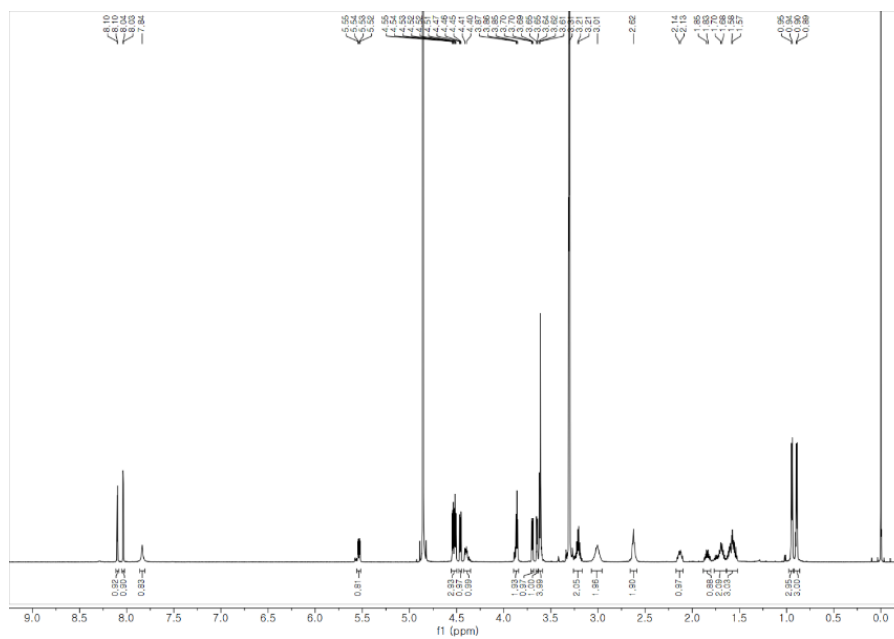

$^1\text{H}$  NMR spectrum of ligand 1A

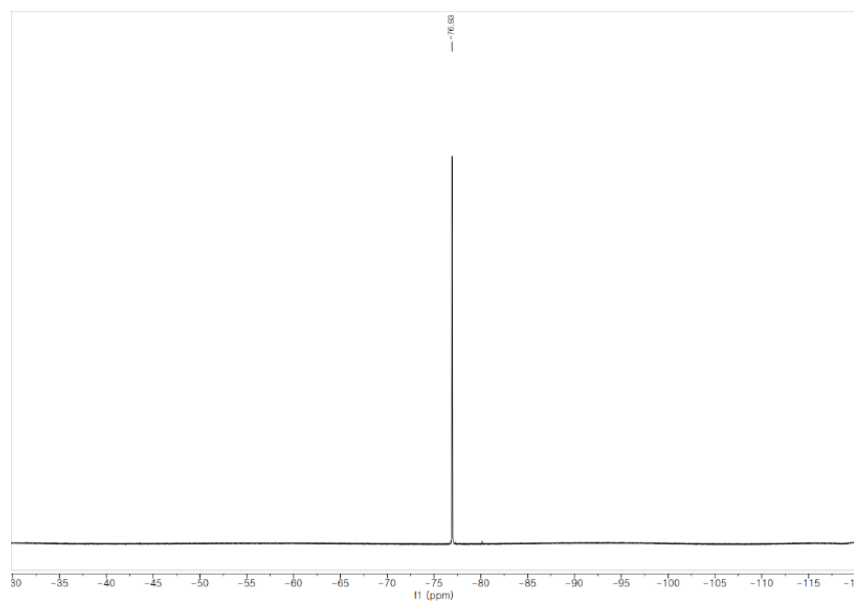

$^{19}\text{F}$  NMR spectrum of ligand 1A

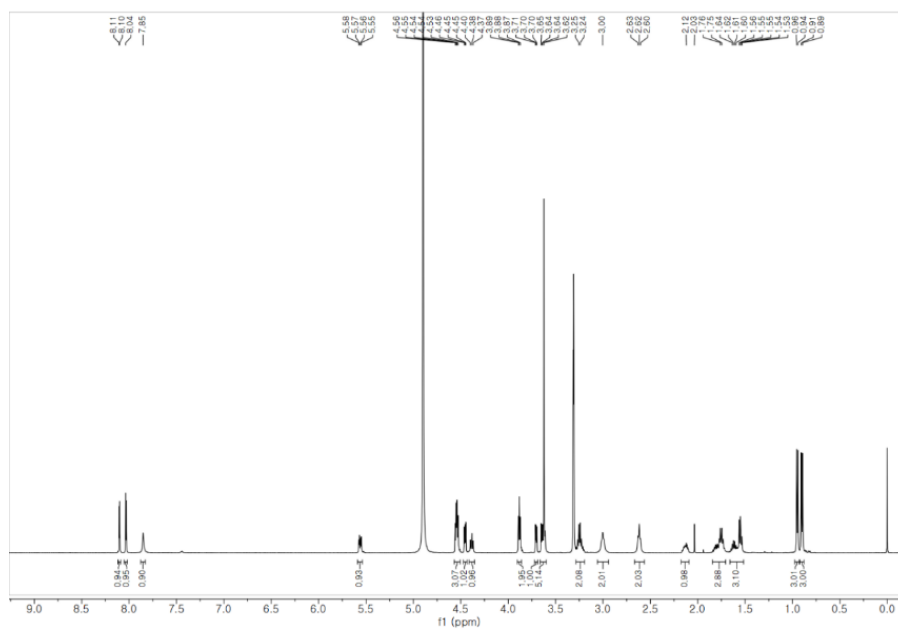

<sup>1</sup>H NMR spectrum of ligand **1B**

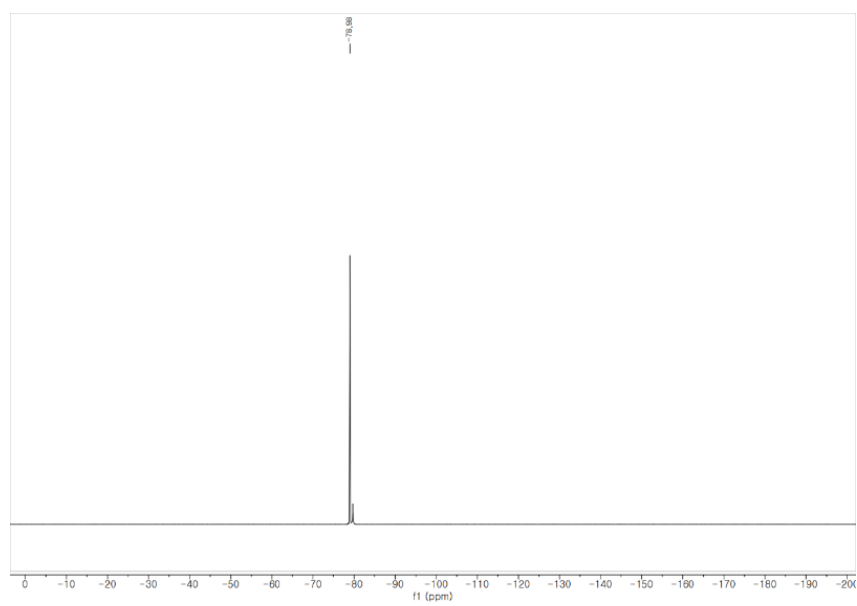

<sup>19</sup>F NMR spectrum of ligand **1B**

# $^1\text{H}$ NMR spectra of **11A** and **11B**

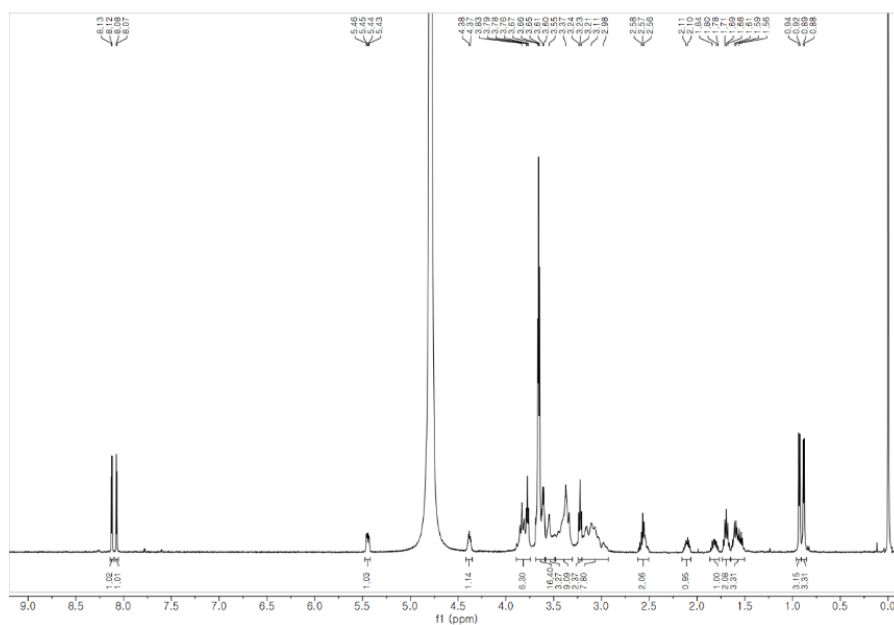

$^1\text{H}$  NMR spectrum of **11A**

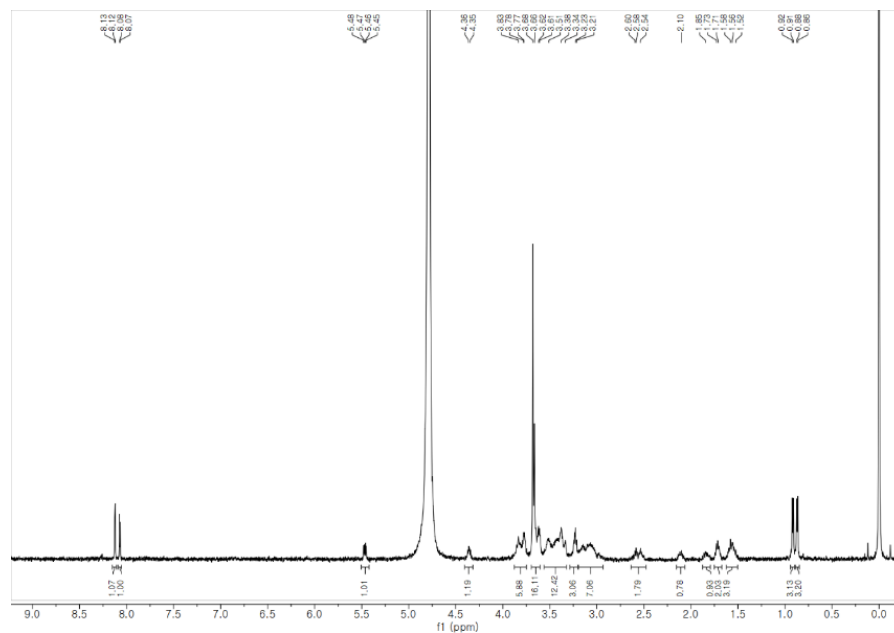

$^1\text{H}$  NMR spectrum of **11B**

## HPLC chromatograms of [<sup>64</sup>Cu]3B

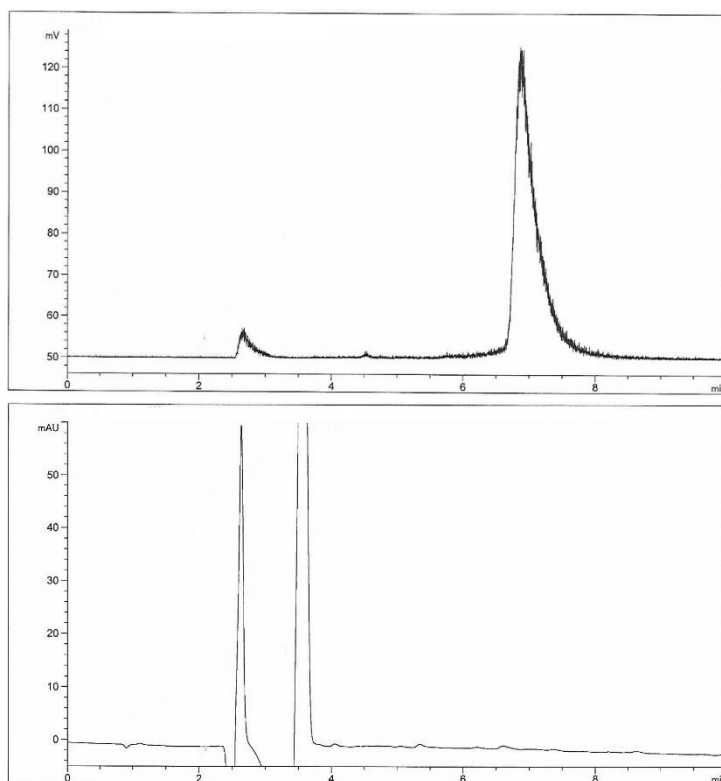

HPLC column: YMC-Pack C18, 4.6 × 250 mm, 5 μm

HPLC solvents: 75:25 water (0.1% TFA) — acetonitrile (0.1% TFA); flow rate: 1 mL/min

Detection: Radioactivity detector (top) and UV detector (230 nm) (bottom)

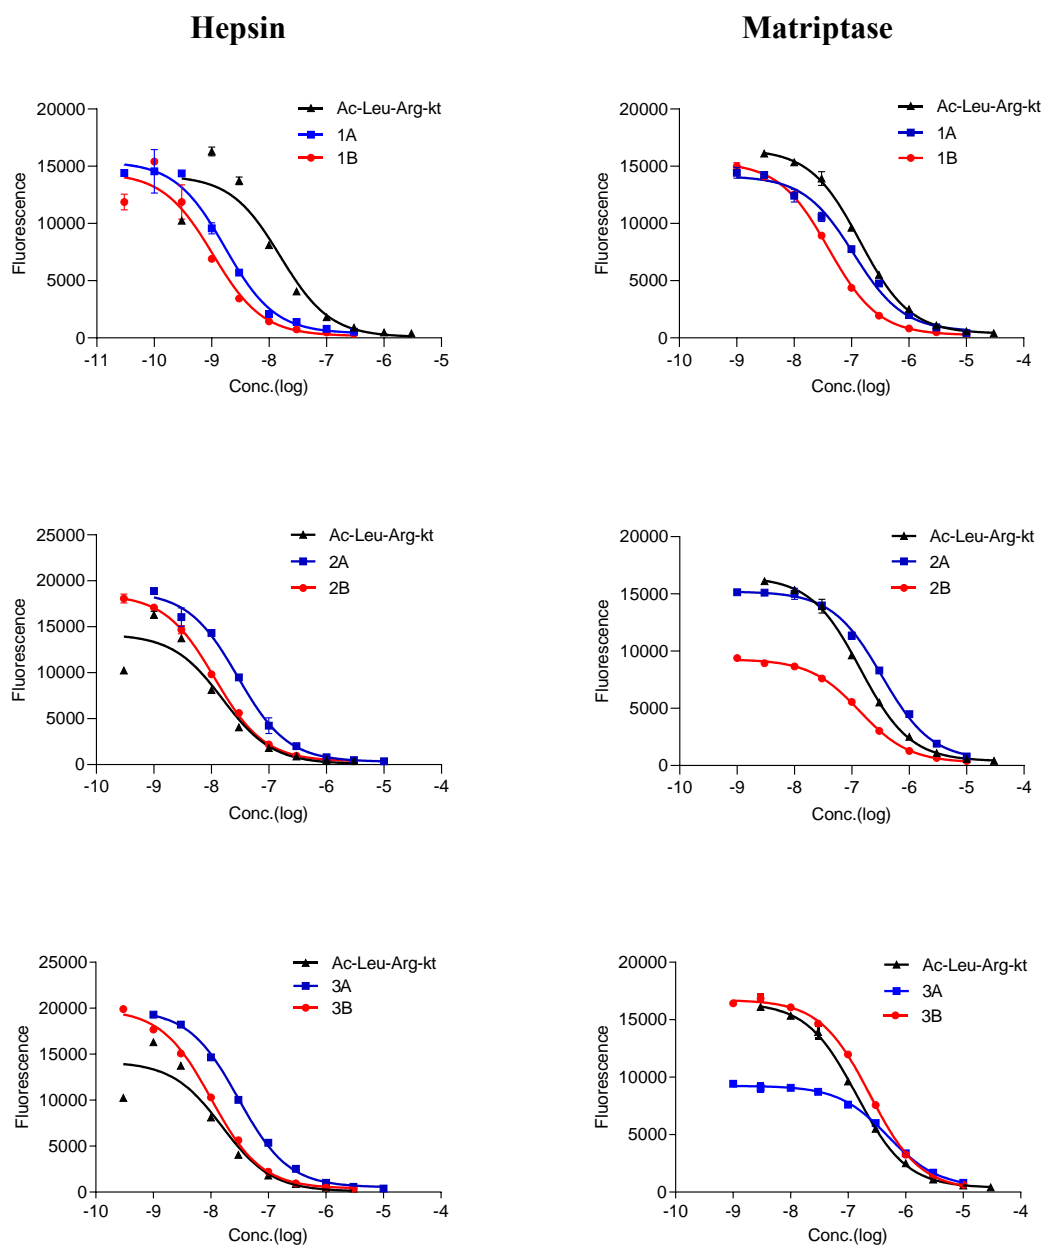

**Figure S1.** IC<sub>50</sub> curves of all six ligands for hepsin (left) and matriptase (right).

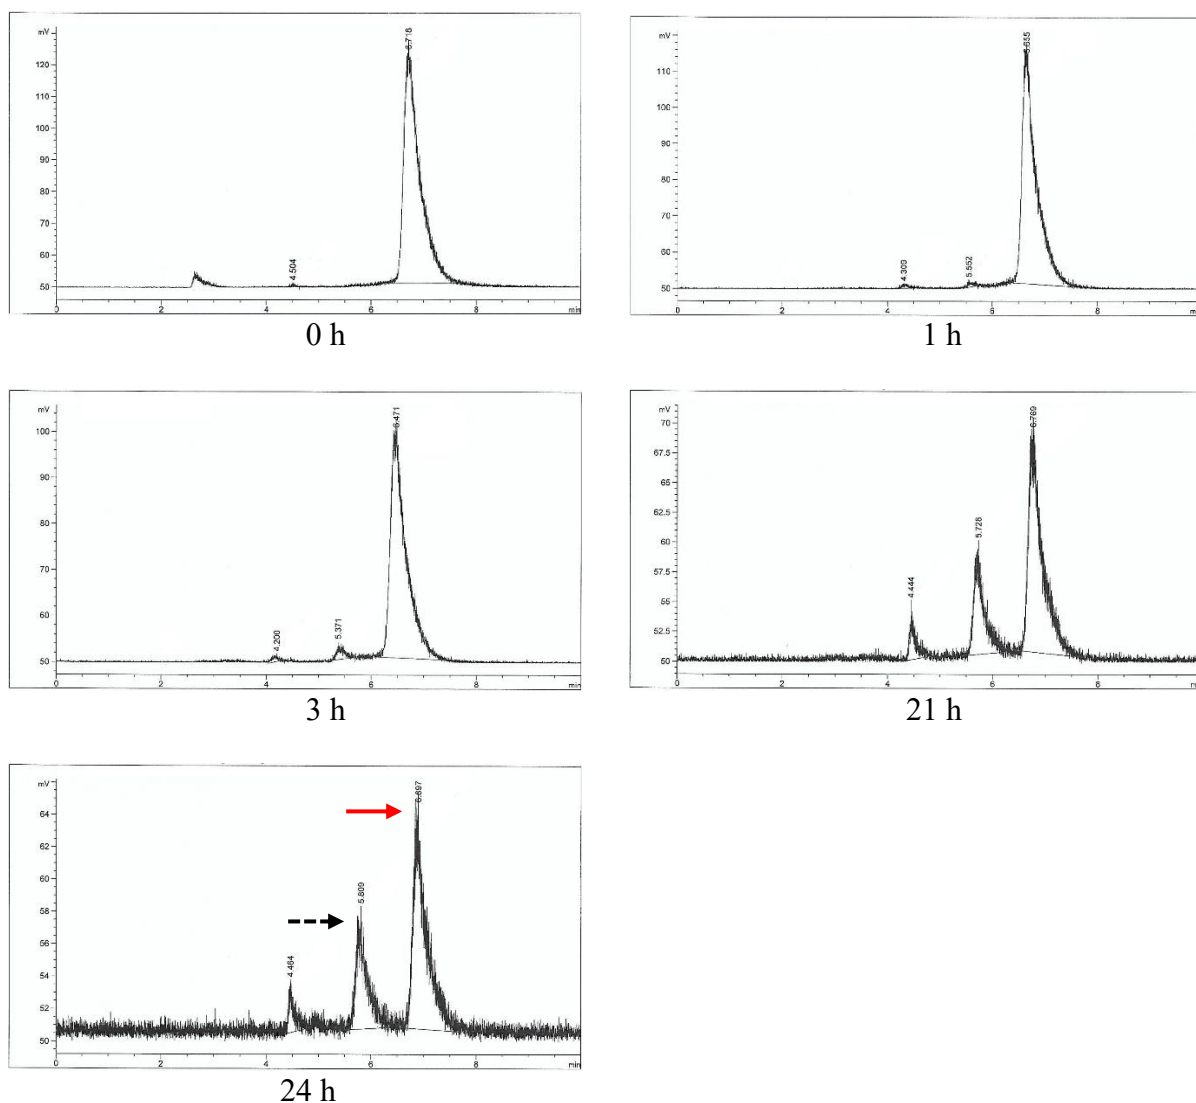

$[^{64}\text{Cu}]\mathbf{3B}$  (red solid arrow);  $[^{64}\text{Cu}]\mathbf{3A}$  (black dotted arrow)

HPLC column: YMC-Pack C18,  $4.6 \times 250$  mm,  $5 \mu\text{m}$

HPLC solvents: 75:25 water (0.1% TFA) — acetonitrile (0.1% TFA)

Flow rate: 1 mL/min

Detection: Radioactivity detector

**Figure S2.** In vitro serum stability of  $[^{64}\text{Cu}]\mathbf{3B}$ .
